# Supplementary material
Source: PubMed Central journal article supplement (PMC9743235)
Supplement: EIJ-D-21-00192_Asano_SD.pdf [file EIJ-D-21-00192_Asano_SD.pdf]

## Supplementary data

### Supplementary Table 1. Definition of an all-comers trial.

An all-comers trial was defined as one enrolling patients without the major exclusion criteria listed below.

- a Stenting for multiple lesions or vessels (>3 lesions or stents)
- b Low ejection fraction of left ventricular (<30 or 35%)
- c Haemodialysis
- d ST-segment elevation myocardial infarction
- e Non-ST-segment elevation acute coronary syndrome
- f Severely calcified lesion
- g Thrombotic lesion
- h Chronic total occlusion
- i In-stent restenosis
- j Saphenous vein graft
- k Arterial graft
- l Unprotected left main coronary artery
- m Bifurcated lesion with side branch (>2 mm) or requiring two stents
- n Aorto-ostial lesion
- o Long lesion with length over 30 mm

## Supplementary Table 2. Search strategy.

|                         |                                                                                                                       | N of publications |
|-------------------------|-----------------------------------------------------------------------------------------------------------------------|-------------------|
| <b>PubMed</b>           |                                                                                                                       |                   |
| #1                      | "Coronary Artery Disease"[Mesh]                                                                                       | 64,648            |
| #2                      | coronary[TIAB]                                                                                                        | 401,835           |
| #3                      | #1 OR #2                                                                                                              | 412,330           |
| #4                      | "Stents"[Mesh]                                                                                                        | 80,154            |
| #5                      | stent*[TIAB]                                                                                                          | 103,181           |
| #6                      | #4 OR #5                                                                                                              | 118,029           |
| #7                      | #3 AND #6                                                                                                             | 34,902            |
| #8                      | "randomized controlled trial"[Publication Type]                                                                       | 526,106           |
| #9                      | "randomized controlled trials as topic"[MeSH Terms]                                                                   | 144,239           |
| #10                     | #8 OR #9                                                                                                              | 662,528           |
| #11                     | #7 AND #10                                                                                                            | 4,499             |
| <b>Embase</b>           |                                                                                                                       |                   |
| #1                      | 'coronary artery disease'/exp                                                                                         | 339,681           |
| #2                      | coronary                                                                                                              | 737,700           |
| #3                      | #1 OR #2                                                                                                              | 739,876           |
| #4                      | 'stent'/exp                                                                                                           | 175,261           |
| #5                      | stent*                                                                                                                | 212,905           |
| #6                      | #4 OR #5                                                                                                              | 215,209           |
| #7                      | #3 AND #6                                                                                                             | 40,842            |
| #8                      | #7 AND ('controlled clinical trial'/de OR 'randomized controlled trial'/de OR 'randomized controlled trial topic'/de) | 3,948             |
| <b>Cochrane Library</b> |                                                                                                                       |                   |
| #1                      | MeSH descriptor: [Coronary Artery Disease] explode all trees                                                          | 6,525             |
| #2                      | coronary:ti,ab,kw                                                                                                     | 56,852            |
| #3                      | #1 or #2                                                                                                              | 56,852            |
| #4                      | MeSH descriptor: [Stents] explode all trees                                                                           | 4,232             |
| #5                      | stent*:ti,ab,kw                                                                                                       | 15,567            |
| #6                      | #4 or #5                                                                                                              | 15,617            |
| #7                      | #3 and #6                                                                                                             | 8,533             |
| #8                      | #7 in Trials                                                                                                          | 8,509             |
| #9                      | #8 not pubmed:an                                                                                                      | 4,204             |
| #10                     | #9 not embase:an                                                                                                      | 1,692             |



|                          |     |    |          |              |              |          |          |              |              |          |          |          |              |              |              |              |          |
|--------------------------|-----|----|----------|--------------|--------------|----------|----------|--------------|--------------|----------|----------|----------|--------------|--------------|--------------|--------------|----------|
| <b>DUTCH PEERS</b>       | YES | 0  | Included | Included     | Included     | Included | Included | Included     | Included     | Included | Included | Included | Included     | Included     | Included     | Included     | Included |
| <b>HOST--ASSURE</b>      | YES | 1  | Included | Included     | Not reported | Included | Included | Not reported | Included     | Included | Included | Included | Included     | Included     | Included     | Included     | Included |
| <b>BASKET-PROVE II</b>   | NO  | 5  | Included | Not reported | Not reported | Included | Included | Not reported | Included     | Included | Excluded | Excluded | Excluded     | Excluded     | Included     | Not reported | Included |
| <b>PLATINUM PLUS</b>     | YES | 0  | Included | Included     | Included     | Included | Included | Included     | Included     | Included | Included | Included | Included     | Included     | Included     | Not reported | Included |
| <b>NEXT</b>              | YES | 0  | Included | Included     | Included     | Included | Included | Included     | Included     | Included | Included | Included | Included     | Included     | Included     | Included     | Included |
| <b>PROMISE</b>           | NO  | 7  | Included | Not reported | Excluded     | Excluded | Included | Not reported | Included     | Excluded | Excluded | Excluded | Not reported | Excluded     | Excluded     | Not reported | Included |
| <b>SORT OUT VI</b>       | YES | 0  | Included | Not reported | Not reported | Included | Included | Not reported | Included     | Included | Included | Included | Not reported | Included     | Included     | Included     | Included |
| <b>BIOSCIENCE</b>        | YES | 0  | Included | Not reported | Not reported | Included | Included | Not reported | Included     | Included | Included | Included | Included     | Included     | Included     | Included     | Included |
| <b>CENTURY II</b>        | NO  | 3  | Included | Excluded     | Excluded     | Included | Included | Included     | Included     | Included | Included | Included | Included     | Included     | Included     | Included     | Included |
| <b>EVOLVE II</b>         | NO  | 6  | Included | Not reported | Not reported | Excluded | Included | Not reported | Not reported | Excluded | Excluded | Excluded | Excluded     | Excluded     | Not Reported | Not reported | Included |
| <b>BIO-RESORT</b>        | YES | 0  | Included | Included     | Included     | Included | Included | Included     | Included     | Included | Included | Included | Included     | Included     | Included     | Not reported | Included |
| <b>SORT OUT VII</b>      | YES | 0  | Included | Included     | Included     | Included | Included | Included     | Included     | Included | Included | Included | Included     | Included     | Included     | Not reported | Included |
| <b>BIOFLOW-IV</b>        | NO  | 15 | Excluded | Excluded     | Excluded     | Excluded | Included | Excluded     | Excluded     | Excluded | Excluded | Excluded | Excluded     | Excluded     | Excluded     | Excluded     | Excluded |
| <b>BIONICS</b>           | NO  | 7  | Excluded | Excluded     | Excluded     | Excluded | Included | Included     | Not reported | Included | Included | Included | Included     | Not reported | Excluded     | Not reported | Excluded |
| <b>HARMONEE</b>          | NO  | 10 | Included | Excluded     | Excluded     | Excluded | Included | Included     | Included     | Excluded | Excluded | Excluded | Excluded     | Excluded     | Excluded     | Not reported | Excluded |
| <b>ReCre8</b>            | YES | 1  | Included | Included     | Included     | Included | Included | Included     | Included     | Included | Included | Included | Included     | Included     | Included     | Included     | Included |
| <b>SORT OUT VIII</b>     | YES | 0  | Included | Included     | Included     | Included | Included | Included     | Included     | Included | Included | Included | Included     | Included     | Included     | Included     | Included |
| <b>BIOFLOW V</b>         | NO  | 10 | Included | Excluded     | Excluded     | Excluded | Included | Included     | Excluded     | Excluded | Excluded | Excluded | Excluded     | Excluded     | Excluded     | Not reported | Included |
| <b>DESSOLVE III</b>      | YES | 1  | Included | Included     | Included     | Included | Included | Included     | Included     | Included | Included | Included | Included     | Included     | Included     | Not reported | Included |
| <b>BIONYX</b>            | YES | 0  | Included | Included     | Included     | Included | Included | Included     | Included     | Included | Included | Included | Included     | Included     | Included     | Included     | Included |
| <b>SORT OUT IX</b>       | YES | 0  | Included | Included     | Included     | Included | Included | Included     | Included     | Included | Included | Included | Included     | Included     | Included     | Included     | Included |
| <b>TARGET All Comers</b> | YES | 0  | Included | Included     | Included     | Included | Included | Included     | Included     | Included | Included | Included | Included     | Included     | Included     | Included     | Included |
| <b>TALENT</b>            | YES | 0  | Included | Included     | Included     | Included | Included | Included     | Included     | Included | Included | Included | Included     | Included     | Included     | Included     | Included |

All the eligible 49 trials enrolling non-specific population are listed. The included all-comers trials are highlighted in red.

CTO: chronic total occlusion; EF: ejection fraction; ISR: in-stent restenosis; N: number; NSTE-ACS: non-ST-segment elevation acute coronary syndrome; STEMI: ST-segment elevation myocardial infarction; SVG: saphenous vein graft

**Supplementary Table 4. Patient baseline characteristics and medication of the included trials.**

| Trial name                | Device        | N of patients | N of lesions | Mean age | Male (%) | Hypertension (%) | Diabetes (%) | Dyslipidaemia (%) | STEMI (%) | NSTE-ACS (%) | Prior MI (%) | Renal insufficiency (%) | N of lesions treated | Beta-blocker (%) | Statin (%) | ACEI/ARB (%) | DAPT at one year (%) |
|---------------------------|---------------|---------------|--------------|----------|----------|------------------|--------------|-------------------|-----------|--------------|--------------|-------------------------|----------------------|------------------|------------|--------------|----------------------|
| <b>SIRTAX</b>             | CYPHER        | 503           | 693          | 62       | 75.9     | 60               | 21.5         | 60.6              | 23.3      | 27.8         | 28.8         |                         | 1.4                  |                  |            |              |                      |
|                           | TAXUS Express | 509           | 708          | 62       | 78.4     | 62.3             | 18.3         | 57                | 21.6      | 30.1         | 29.7         |                         | 1.4                  |                  |            |              |                      |
| <b>LEADERS</b>            | BioMatrix     | 857           | 1,257        | 64.6     | 75       | 73.5             | 26           | 65.3              | 15.8      | 39.1         | 32.2         |                         | 1.5                  |                  |            |              |                      |
|                           | CYPHER        | 850           | 1,215        | 64.5     | 74.6     | 72.7             | 22.5         | 68.2              | 16.5      | 39.2         | 32.6         |                         | 1.4                  |                  |            |              |                      |
| <b>SORT OUT III</b>       | Endeavor      | 1,162         | 1,619        | 64.3     | 73.3     | 54               | 15           | 70                | 6         | 37.5         | 25           |                         |                      |                  |            |              |                      |
|                           | CYPHER        | 1,170         | 1,611        | 64.3     | 73.7     | 51               | 14           | 68                | 8.5       | 38.1         | 26           |                         |                      |                  |            |              |                      |
| <b>COMPARE</b>            | XIENCE        | 897           | 1,286        | 62.9     | 69       | 46.5             | 17.1         | 49.8              | 26.8      | 33.6         | 15           | 3                       | 1.4                  |                  |            |              | 70                   |
|                           | TAXUS Liberté | 903           | 1,294        | 63.6     | 72.4     | 49.5             | 19           | 49.9              | 23.5      | 35.7         | 18           | 3                       | 1.4                  |                  |            |              | 70                   |
| <b>PROTECT</b>            | Endeavor      | 4,357         | 6,151        | 62.3     | 76.7     | 64.6             | 26.9         | 61.8              | 8.2       | 17.6         | 20           |                         | 1.4                  |                  |            |              | 87                   |
|                           | CYPHER        | 4,352         | 6,140        | 62.1     | 76       | 63.4             | 28.4         | 62.8              | 8.8       | 17.1         | 21           |                         | 1.39                 |                  |            |              | 88                   |
| <b>SORT OUT IV</b>        | XIENCE/PROMUS | 1,390         | 1,805        | 64.2     | 75.9     | 56.7             | 14           | 71.1              | 8.8       | 32.9         | 21.5         |                         | 1.3                  |                  |            |              |                      |
|                           | CYPHER        | 1,384         | 1,779        | 64       | 75.2     | 53.8             | 14.2         | 71.1              | 10.5      | 32.7         | 20.6         |                         | 1.3                  |                  |            |              |                      |
| <b>Resolute All Comer</b> | Resolute      | 1,140         | 1,661        | 64.4     | 76.7     | 71.1             | 23.5         | 63.9              | 34.5      | 19.4         | 28.9         |                         | 1.46                 |                  |            |              |                      |
|                           | XIENCE        | 1,152         | 1,705        | 64.2     | 77.2     | 71.3             | 23.4         | 67.7              | 33.7      | 18.9         | 30.4         |                         | 1.48                 |                  |            |              |                      |
| <b>COMPARE II</b>         | Nobori        | 1,795         | 2,638        | 63       | 74.4     | 54.8             | 21.8         |                   | 20.7      | 37.2         | 20.3         | 4.3                     | 1.5                  |                  |            |              | 66.6                 |
|                           | XIENCE        | 912           | 1,387        | 62.7     | 74.3     | 56.3             | 21.6         |                   | 21.6      | 36.2         | 18.8         | 4.4                     | 1.5                  |                  |            |              | 65.9                 |
| <b>SORT OUT V</b>         | Nobori        | 1,229         | 1,532        | 65       | 74.6     | 55.5             | 15.1         | 57.8              | 18.3      | 30.3         | 17.7         |                         | 1.25                 |                  |            |              |                      |
|                           | CYPHER        | 1,239         | 1,555        | 65.2     | 75.1     | 52.7             | 15.3         | 58.9              | 18.3      | 31           | 17.3         |                         | 1.26                 |                  |            |              |                      |
| <b>RESET</b>              | XIENCE        | 1,597         | 1,967        | 68.9     | 77.5     | 79.5             | 45.5         | 74.5              | 6.5       | 11.3         | 29           | 2.1                     | 1.23                 | 36.8             | 77.4       | 61.8         | 11.1                 |

|                      |               |       |       |      |      |      |      |      |      |      |      |     |      |      |      |      |      |
|----------------------|---------------|-------|-------|------|------|------|------|------|------|------|------|-----|------|------|------|------|------|
|                      | CYPHER        | 1,600 | 1,960 | 69.3 | 76.1 | 80.6 | 44.6 | 75.3 | 5.2  | 13.3 | 31   | 2.4 | 1.23 | 37.7 | 77.4 | 60.9 | 10.4 |
| <b>DUTCH PEERS</b>   | Resolute      | 906   | 1,205 | 64   | 73.4 | 55.2 | 18.4 | 46.1 | 19.3 | 39.6 | 23   | 4   |      |      |      |      |      |
|                      | XIENCE        | 905   | 1,166 | 65   | 72.6 | 53   | 17.3 | 47.5 | 21.5 | 36.8 | 21   | 3   |      |      |      |      |      |
| <b>HOST-ASSURE</b>   | PROMUS        | 2,503 | 3,426 | 63.1 | 69.8 | 68.2 | 31.8 | 64   | 11.3 | 18.1 | 4.6  | 2.4 |      | 68.3 | 84.8 | 65.4 | 91.1 |
|                      | Resolute      | 1,252 | 1,661 | 63.5 | 65.6 | 68.1 | 32   | 65.7 | 10.9 | 16.7 | 3.9  | 2.9 |      | 67.5 | 85.9 | 66.2 | 92.6 |
| <b>PLATINUM PLUS</b> | PROMUS        | 1,952 | 3,289 | 65.7 | 77.7 | 68   | 29.1 | 63.4 | 8.7  | 28.1 | 21.7 |     | 1.6  |      |      |      | 59.4 |
|                      | XIENCE        | 1,028 | 1,711 | 66.1 | 78.4 | 68.6 | 27.2 | 62.2 | 9.3  | 27.6 | 24.3 |     | 1.6  |      |      |      | 61.2 |
| <b>NEXT</b>          | Nobori        | 1,617 | 1,985 | 69.1 | 77   | 81.4 | 46.1 | 78.2 | 5.1  | 11.6 | 28   | 2.5 | 1.27 |      |      |      | 86.7 |
|                      | XIENCE/PROMUS | 1,618 | 1,947 | 69.3 | 77.4 | 81.8 | 45.7 | 78.1 | 4.4  | 11.1 | 28   | 2.6 | 1.24 |      |      |      | 87.5 |
| <b>SORT OUT VI</b>   | Resolute      | 1,502 | 1,883 | 65.7 | 76.2 | 59.7 | 17.6 | 59.3 | 19.6 | 31   | 18.7 |     | 1.3  |      |      |      |      |
|                      | BioMatrix     | 1,497 | 1,791 | 65.8 | 75.8 | 58.1 | 18   | 59.1 | 16.9 | 33.9 | 19.7 |     | 1.3  |      |      |      |      |
| <b>BIOSCIENCE</b>    | Orsiro        | 1,063 | 1,594 | 66.1 | 77   | 68.5 | 24.2 | 67   | 19.8 | 34.4 | 21   |     | 1.5  | 47.3 | 53.6 | 25.9 | 83.4 |
|                      | XIENCE        | 1,056 | 1,545 | 65.9 | 77.3 | 66.9 | 21.7 | 67.8 | 18.6 | 33.9 | 19.3 |     | 1.46 | 45.4 | 54.2 | 26.6 | 82.1 |
| <b>BIO-RESORT</b>    | SYNERGY       | 1,172 | 1,532 | 64   | 72.1 | 44.4 | 17.3 | 36   | 32.2 | 37.5 | 16   | 3   |      |      |      |      | 85.5 |
|                      | Resolute      | 1,173 | 1,580 | 63.6 | 72.3 | 47.2 | 17.9 | 38.4 | 27.8 | 41.7 | 21   | 3   |      |      |      |      | 86.3 |
|                      | Orsiro        | 1,169 | 1,551 | 64.2 | 73.1 | 47   | 18   | 39.6 | 31.7 | 38.3 | 18   | 4   |      |      |      |      | 85.1 |
| <b>SORT OUT VII</b>  | Orsiro        | 1,261 | 1,590 | 66.1 | 74.9 | 58.1 | 18.7 | 57.6 | 21.3 | 30.8 | 17.4 |     | 1.3  |      |      |      |      |
|                      | Nobori        | 1,264 | 1,588 | 64.8 | 75.2 | 56.4 | 18.6 | 56.7 | 20.7 | 32.6 | 17.8 |     | 1.3  |      |      |      |      |
| <b>ReCre8</b>        | Resolute      | 744   | 1,024 | 65.1 | 77.6 | 55.2 | 20   | 45.7 | 22.4 | 25   | 21.2 |     |      |      |      |      | 40.1 |
|                      | Cre8          | 747   | 1,087 | 64.7 | 75.6 | 55.2 | 20.7 | 43.5 | 24.2 | 22.6 | 18.6 |     |      |      |      |      | 39.4 |
| <b>SORT OUT VIII</b> | SYNERGY       | 1,385 | 1,725 | 66   | 76.5 | 56.1 | 18.1 | 54   |      |      | 18   |     |      |      |      |      |      |
|                      | BioMatrix     | 1,379 | 1,670 | 66   | 76.6 | 57.7 | 19   | 52.5 |      |      | 17   |     |      |      |      |      |      |
| <b>DESSOLVE III</b>  | MiStent       | 703   | 1,037 | 66.4 | 70.3 | 72   | 26.6 | 60.8 | 14.7 | 44.2 | 27   | 7   | 1.49 |      |      |      |      |

|                          |               |       |       |      |      |      |      |      |      |      |      |     |      |
|--------------------------|---------------|-------|-------|------|------|------|------|------|------|------|------|-----|------|
|                          | XIENCE        | 695   | 993   | 66.3 | 73.8 | 75   | 27.1 | 60   | 15.7 | 43   | 28   | 7   | 1.44 |
| <b>SORT OUT IX</b>       | BioFreedom    | 1,572 | 1,966 | 66.4 | 77.5 | 56.8 | 16.7 | 52.8 | 23.3 | 32   | 14.7 |     | 1.3  |
|                          | Orsiro        | 1,579 | 1,985 | 66.1 | 77.3 | 53.8 | 16.6 | 49.2 | 25.1 | 32   | 15.2 |     | 1.3  |
| <b>BIONYX</b>            | Resolute Onyx | 1,243 | 1,646 | 64.1 | 76.1 | 51.5 | 20.9 | 45.4 | 22.7 | 48.1 | 16.1 | 6.7 | 83.9 |
|                          | Orsiro        | 1,245 | 1,593 | 63.9 | 76.1 | 53.2 | 20.1 | 46.4 | 27.2 | 43.9 | 15.6 | 6.7 | 82.2 |
| <b>TARGET All Comers</b> | FIREHAWK      | 823   | 1,221 | 64.9 | 78.1 | 59.9 | 24   | 53   | 8.4  | 35.4 | 21.7 | 5.5 | 1.5  |
|                          | XIENCE        | 830   | 1,179 | 65.3 | 76.4 | 62.5 | 23   | 51.2 | 8.9  | 35.4 | 24.8 | 7   | 1.4  |
| <b>TALENT</b>            | Supraflex     | 720   | 1,046 | 66   | 75.8 | 65.3 | 21.8 | 61.8 | 16.5 | 43.1 | 18.9 | 2.8 | 1.45 |
|                          | XIENCE        | 715   | 1,030 | 65   | 76   | 66   | 24.9 | 60.2 | 16.4 | 40.3 | 17.9 | 2   | 1.44 |

ACEI/ARB: angiotensin-converting enzyme inhibitors/angiotensin II receptor blocker; AHA/ACC: American Heart Association/American College of Cardiology; DAPT: dual antiplatelet therapy; LVEF: left ventricular ejection fraction; N: number; NSTEMI: non-ST-segment elevation acute coronary syndrome; STEMI: ST-segment elevation myocardial infarction

**Supplementary Table 5. Definitions of myocardial infarction in the included trials.**

| <b>Trial name</b>          | <b>Study start year</b> | <b>Definition of spontaneous MI</b>                                                                            |
|----------------------------|-------------------------|----------------------------------------------------------------------------------------------------------------|
| <b>SIRTAX</b>              | 2003                    | Q or CKMB/cTn>2ULN                                                                                             |
| <b>LEADERS</b>             | 2006                    | ECG or (CK>2ULN + CKMB/cTn>1ULN)                                                                               |
| <b>SORT OUT III</b>        | 2006                    | Clinical/ECG + cTn>1ULN [Universal definition] <sup>70</sup>                                                   |
| <b>COMPARE</b>             | 2007                    | Clinical/ECG + CKMB/cTn>1ULN                                                                                   |
| <b>PROTECT</b>             | 2007                    | ECG or (clinical + CKMB/cTn>1ULN)                                                                              |
| <b>SORT OUT IV</b>         | 2007                    | Clinical/ECG + cTn>1ULN [Universal definition]                                                                 |
| <b>Resolute All Comers</b> | 2008                    | (Clinical + Q + cTn/CK>1ULN) or (CK>2ULN + CKMB/cTn>1ULN) or CKMB/cTn>3ULN [Extended historical] <sup>71</sup> |
| <b>COMPARE II</b>          | 2009                    | Clinical/ECG + CKMB/cTn>1ULN                                                                                   |
| <b>SORT OUT V</b>          | 2009                    | Clinical/ECG + cTn>1ULN [Universal definition]                                                                 |
| <b>DUTCH PEERS</b>         | 2010                    | (Clinical + Q + cTn/CK>1ULN) or (CK>2ULN + CKMB/cTn>1ULN) or CKMB/cTn>3ULN [Extended historical]               |
| <b>HOST-ASSURE</b>         | 2010                    | Clinical/ECG + cTn>1ULN [Universal definition]                                                                 |
| <b>PLATINUM PLUS</b>       | 2010                    | (Q + CKMB/cTn>1ULN) or (ECG/clinical + CKMB/cTn>2ULN)                                                          |
| <b>RESET</b>               | 2010                    | CKMB/cTn>1ULN [ARC]                                                                                            |
| <b>NEXT</b>                | 2011                    | CKMB/cTn>1ULN [ARC]                                                                                            |
| <b>SORT OUT VI</b>         | 2011                    | Clinical/ECG + cTn>1ULN [Universal definition]                                                                 |
| <b>BIO-RESORT</b>          | 2012                    | (Clinical + Q + cTn/CK>1ULN) or (CK>2ULN + CKMB/cTn>1ULN) or CKMB/cTn>3ULN [Extended historical]               |
| <b>BIOSCIENCE</b>          | 2012                    | Clinical/ECG + cTn>1ULN [Universal definition]                                                                 |
| <b>SORT OUT VII</b>        | 2012                    | Clinical/ECG + cTn>1ULN [Universal definition]                                                                 |
| <b>ReCre8</b>              | 2014                    | CKMB/cTn>1ULN [ARC]                                                                                            |
| <b>SORT OUT VIII</b>       | 2014                    | Clinical/ECG + cTn>1ULN [Universal definition]                                                                 |
| <b>BIONYX</b>              | 2015                    | (Clinical + Q + cTn/CK>1ULN) or (CK>2ULN + CKMB/cTn>1ULN) or CKMB/cTn>3ULN [Extended historical]               |
| <b>DESSOLVE III</b>        | 2015                    | (Clinical + Q + cTn/CK>1ULN) or (CK>2ULN + CKMB/cTn>1ULN) or CKMB/cTn>3ULN [Extended historical]               |
| <b>SORT OUT IX</b>         | 2015                    | Clinical/ECG + cTn>1ULN [Universal definition]                                                                 |
| <b>TARGET All Comers</b>   | 2015                    | Clinical/ECG + cTn>1ULN [Universal definition]                                                                 |
| <b>TALENT</b>              | 2016                    | Clinical/ECG + cTn>1ULN [Universal definition]                                                                 |

ARC: Academic Research Consortium; CKMB: creatine kinase myocardial band; Clinical: clinical findings related to myocardial infarction; cTn: cardiac troponin; ECG: ischaemic change in electrocardiograph; MI: myocardial infarction; Q: Q-wave detected on electrocardiograph; SCAI: Society for Cardiovascular Angiography and Interventions; ULN: upper limit of normal



## Summary Table for the definition of spontaneous myocardial infarction

|                                                                                                                         | N of trials |
|-------------------------------------------------------------------------------------------------------------------------|-------------|
| <b>2003 -2007</b>                                                                                                       |             |
| clinical/ECG + cTn>1ULN [ <b>Universal definition</b> ] <sup>70</sup>                                                   | 2           |
| ECG or (CK>2ULN + CKMB/cTn>1ULN)                                                                                        | 1           |
| Q or CKMB/cTn>2ULN                                                                                                      | 1           |
| Clinical/ECG + CKMB/cTn>1ULN                                                                                            | 1           |
| ECG or (clinical + CKMB/cTn>1ULN)                                                                                       | 1           |
| <b>2008 - 2012</b>                                                                                                      |             |
| clinical/ECG + cTn>1ULN [ <b>Universal definition</b> ] <sup>70</sup>                                                   | 5           |
| (clinical + Q + cTn/CK>1ULN) or (CK>2ULN + CKMB/cTn>1ULN) or CKMB/cTn>3ULN [ <b>Extended historical</b> ] <sup>71</sup> | 3           |
| CKMB/cTn>1ULN [ <b>ARC</b> ] <sup>72</sup>                                                                              | 2           |
| (Q + CKMB/cTn>1ULN) or (ECG/clinical + CKMB/cTn>2ULN)                                                                   | 1           |
| <b>2013 - 2016</b>                                                                                                      |             |
| clinical/ECG + cTn>1ULN [ <b>Universal definition</b> ] <sup>70</sup>                                                   | 4           |
| (clinical + Q + cTn/CK>1ULN) or (CK>2ULN + CKMB/cTn>1ULN) or CKMB/cTn>3ULN [ <b>Extended historical</b> ] <sup>71</sup> | 2           |
| CKMB/cTn>1ULN [ <b>ARC</b> ] <sup>72</sup>                                                                              | 1           |

ARC: Academic Research Consortium; CKMB: creatine kinase myocardial band; Clinical: clinical findings related to myocardial infarction; cTn: cardiac troponin; ECG: ischaemic change on electrocardiograph; N: number; Q: Q-wave detected on electrocardiograph; SCAI: Society for Cardiovascular Angiography and Interventions; ULN: upper limit of normal

**Supplementary Table 6. Definitions of cardiac death and clinically indicated target lesion revascularisation.**

| <b>Trial name</b>         | <b>Definition for cardiac death</b>                                                                                                                    | <b>Definition for clinically indicated TLR</b> |
|---------------------------|--------------------------------------------------------------------------------------------------------------------------------------------------------|------------------------------------------------|
| <b>SIRTAX</b>             | Definition not reported                                                                                                                                | ARC                                            |
| <b>LEADERS</b>            | ARC                                                                                                                                                    | ARC                                            |
| <b>SORT OUT III</b>       | ARC                                                                                                                                                    | N/A <sup>#</sup>                               |
| <b>COMPARE</b>            | ARC                                                                                                                                                    | ARC                                            |
| <b>PROTECT</b>            | ARC                                                                                                                                                    | N/A <sup>#</sup>                               |
| <b>SORT OUT IV</b>        | ARC                                                                                                                                                    | Clinically driven                              |
| <b>Resolute All Comer</b> | ARC                                                                                                                                                    | ARC                                            |
| <b>COMPARE II</b>         | ARC                                                                                                                                                    | ARC                                            |
| <b>SORT OUT V</b>         | ARC                                                                                                                                                    | Clinically driven                              |
| <b>DUTCH PEERS</b>        | ARC                                                                                                                                                    | ARC                                            |
| <b>HOST-ASSURE</b>        | ARC                                                                                                                                                    | ARC                                            |
| <b>PLATINUM PLUS</b>      | Death due to MI; arrhythmia or conduction disturbance; deaths related to the procedure; stroke prior to hospital discharge; and death of unknown cause | ARC*                                           |
| <b>RESET</b>              | ARC                                                                                                                                                    | ARC                                            |
| <b>NEXT</b>               | ARC                                                                                                                                                    | ARC                                            |
| <b>SORT OUT VI</b>        | ARC                                                                                                                                                    | Clinically driven                              |
| <b>BIO-RESORT</b>         | ARC                                                                                                                                                    | ARC*                                           |
| <b>BIOSCIENCE</b>         | ARC                                                                                                                                                    | ARC*                                           |
| <b>SORT OUT VII</b>       | ARC                                                                                                                                                    | Clinically driven                              |
| <b>ReCre8</b>             | ARC                                                                                                                                                    | N/A <sup>#</sup>                               |
| <b>SORT OUT VIII</b>      | ARC                                                                                                                                                    | Clinically driven                              |
| <b>BIONYX</b>             | ARC                                                                                                                                                    | ARC                                            |
| <b>DESSOLVE III</b>       | ARC                                                                                                                                                    | ARC                                            |
| <b>SORT OUT IX</b>        | ARC                                                                                                                                                    | Clinical-driven                                |
| <b>TARGET All Comers</b>  | Definition not reported                                                                                                                                | Definition not reported (ischaemia-driven)     |
| <b>TALENT</b>             | ARC                                                                                                                                                    | ARC                                            |

<sup>#</sup> Trial did not report the incidence of clinically indicated TLR. \* The ARC definition was applied but quantitative coronary angiography was not performed at an independent angiographic core laboratory.

ARC: Academic Research Consortium; MI: myocardial infarction; TLR: target lesion revascularisation

**Supplementary Table 7. Bias assessment of the included trials.**

| Trial name         | RANDOM SEQUENCE GENERATION | ALLOCATION CONCEALMENT | BLINDING OF PARTICIPANTS AND PERSONNEL* | BLINDING OF OUTCOME ASSESSMENT | INCOMPLETE OUTCOME DATA | SELECTIVE REPORTING | OTHER BIAS |
|--------------------|----------------------------|------------------------|-----------------------------------------|--------------------------------|-------------------------|---------------------|------------|
| SIRTAX             | Low                        | Low                    | High                                    | Low                            | Low                     | Low                 | Low        |
| LEADERS            | Low                        | Low                    | High                                    | Low                            | Low                     | Low                 | Low        |
| SORT OUT III       | Low                        | Low                    | High                                    | Low                            | Low                     | Low                 | Low        |
| COMPARE            | Low                        | Low                    | High                                    | Low                            | Low                     | Low                 | Low        |
| PROTECT            | Low                        | Low                    | High                                    | Low                            | Low                     | Low                 | Low        |
| SORT OUT IV        | Low                        | Low                    | High                                    | Low                            | Low                     | Low                 | Low        |
| Resolute All Comer | Low                        | Low                    | High                                    | Low                            | Low                     | Low                 | Low        |
| COMPARE II         | Low                        | Low                    | High                                    | Low                            | Low                     | Low                 | Low        |
| SORT OUT V         | Low                        | Low                    | High                                    | Low                            | Low                     | Low                 | Low        |
| RESET              | Low                        | Low                    | High                                    | Low                            | Low                     | Low                 | Low        |
| DUTCH PEERS        | Low                        | Low                    | High                                    | Low                            | Low                     | Low                 | Low        |
| HOST-ASSURE        | Low                        | Low                    | High                                    | Low                            | Low                     | Low                 | Low        |
| PLATINUM PLUS      | Low                        | Low                    | High                                    | Low                            | Low                     | Low                 | Low        |
| NEXT               | Low                        | Low                    | High                                    | Low                            | Low                     | Low                 | Low        |
| SORT OUT VI        | Low                        | Low                    | High                                    | Low                            | Low                     | Low                 | Low        |
| BIOSCIENCE         | Low                        | Low                    | High                                    | Low                            | Low                     | Low                 | Low        |
| BIO-RESORT         | Low                        | Low                    | High                                    | Low                            | Low                     | Low                 | Low        |
| SORT OUT VII       | Low                        | Low                    | High                                    | Low                            | Low                     | Low                 | Low        |
| ReCre8             | Low                        | Low                    | High                                    | Low                            | Low                     | Low                 | Low        |
| SORT OUT VIII      | Low                        | Low                    | High                                    | Low                            | Low                     | Low                 | Low        |
| DESSOLVE III       | Low                        | Low                    | High                                    | Low                            | Low                     | Low                 | Low        |
| BIONYX             | Low                        | Low                    | High                                    | Low                            | Low                     | Low                 | Low        |
| SORT OUT IX        | Low                        | Low                    | High                                    | Low                            | Low                     | Low                 | Low        |
| TARGET All Comers  | Low                        | Low                    | High                                    | Low                            | Low                     | Low                 | Low        |
| TALENT             | Low                        | Low                    | High                                    | Low                            | Low                     | Low                 | Low        |

\* In all trials, the operator was not blinded while the assessors (clinical events committee, core laboratory, and statistician) were blinded. Awareness of the allocated stent possibly introduces a bias in the operator's procedure (e.g., lesion preparation, post-dilatation, etc.).

**Supplementary Table 8. Performance of routine angiographic follow-up in the included trials.**

| Study name         | Device         | N of patients | Month at angio FU | N of patients undergoing angio FU | Patients with angio FU (%) | Month at 1Y TLR | 1Y TLR (%) | Angio FU performed before 1Y result |
|--------------------|----------------|---------------|-------------------|-----------------------------------|----------------------------|-----------------|------------|-------------------------------------|
| SIRTAX             | CYPHER         | 503           | 8                 | 267                               | 53.1%                      | 12              | 5.8%       | YES                                 |
|                    | TAXUS Express  | 509           |                   | 273                               | 53.6%                      |                 | 10.2%      |                                     |
| LEADERS            | BioMatrix      | 857           | 9                 | 168                               | 19.6%                      | 12              | 5.2%       | YES                                 |
|                    | CYPHER         | 850           |                   | 167                               | 19.6%                      |                 | 5.8%       |                                     |
| SORT OUT III       | Endeavor       | 1,162         | No angio FU       |                                   |                            | 12              | 5.3%       |                                     |
|                    | CYPHER         | 1,170         |                   |                                   |                            |                 | 1.4%       |                                     |
| COMPARE            | XIENCE         | 897           | No angio FU       |                                   |                            | 12              | 1.7%       |                                     |
|                    | TAXUS Liberté  | 903           |                   |                                   |                            |                 | 4.8%       |                                     |
| PROTECT            | Endeavor       | 4357          | No angio FU       |                                   |                            | 12              |            |                                     |
|                    | CYPHER         | 4,352         |                   |                                   |                            |                 |            |                                     |
| SORT OUT IV        | XIENCE/PROMUS  | 1,390         | No angio FU       |                                   |                            | 9               | 1.4%       |                                     |
|                    | CYPHER         | 1,384         |                   |                                   |                            |                 | 1.7%       |                                     |
| Resolute All Comer | Resolute       | 1,140         | 13                | 142                               | 12.5%                      | 12              | 3.9%       | NO                                  |
|                    | XIENCE         | 1,152         |                   | 130                               | 11.3%                      |                 | 3.4%       |                                     |
| COMPARE II         | Nobori         | 1,795         | No angio FU       |                                   |                            | 12              | 2.1%       |                                     |
|                    | XIENCE         | 912           |                   |                                   |                            |                 | 1.8%       |                                     |
| SORT OUT V         | Nobori         | 1,229         | No angio FU       |                                   |                            | 12              | 3.3%       |                                     |
|                    | CYPHER         | 1,239         |                   |                                   |                            |                 | 2.0%       |                                     |
| DUTCH PEERS        | Resolute       | 906           | No angio FU       |                                   |                            | 12              | 2.2%       |                                     |
|                    | XIENCE         | 905           |                   |                                   |                            |                 | 2.2%       |                                     |
| HOST-ASSURE        | PROMUS         | 2,503         | No angio FU       |                                   |                            | 12              | 1.3%       |                                     |
|                    | Resolute       | 1,252         |                   |                                   |                            |                 | 1.2%       |                                     |
| PLATINUM PLUS      | PROMUS Element | 1,952         | No angio FU       |                                   |                            | 12              | 2.0%       |                                     |
|                    | XIENCE         | 1,028         |                   |                                   |                            |                 | 1.6%       |                                     |
| RESET              | XIENCE         | 1,597         | 8                 | 235                               | 14.7%                      | 12              | 2.9%       | YES                                 |
|                    | CYPHER         | 1,600         |                   | 247                               | 15.4%                      |                 | 3.7%       |                                     |
| NEXT               | Nobori         | 1,617         | 8                 | 227                               | 14.0%                      | 12              | 2.9%       | YES                                 |
|                    | XIENCE/PROMUS  | 1,618         |                   | 230                               | 14.2%                      |                 | 2.9%       |                                     |
| SORT OUT VI        | Resolute       | 1,502         | No angio FU       |                                   |                            | 12              | 3.5%       |                                     |
|                    | BioMatrix      | 1,497         |                   |                                   |                            |                 | 3.1%       |                                     |
| BIO-RESORT         | SYNERGY        | 1,172         | No angio FU       |                                   |                            | 12              | 1.5%       |                                     |
|                    | Resolute       | 1,173         |                   |                                   |                            |                 | 1.5%       |                                     |
|                    | Orsiro         | 1,169         |                   |                                   |                            |                 | 1.5%       |                                     |
| BIOSCIENCE         | Orsiro         | 1,063         | No angio FU       |                                   |                            | 12              | 3.4%       |                                     |
|                    | XIENCE         | 1,056         |                   |                                   |                            |                 | 2.4%       |                                     |
| SORT OUT VII       | Orsiro         | 1,261         | No angio FU       |                                   |                            | 12              | 2.0%       |                                     |
|                    | Nobori         | 1,264         |                   |                                   |                            |                 | 2.9%       |                                     |
| ReCre8             | Resolute       | 751           | No angio FU       |                                   |                            | 12              |            |                                     |
|                    | Cre8           | 751           |                   |                                   |                            |                 |            |                                     |
| SORT OUT VIII      | SYNERGY        | 1,385         | No angio FU       |                                   |                            | 12              | 2.3%       |                                     |
|                    | BioMatrix      | 1,379         |                   |                                   |                            |                 | 2.5%       |                                     |
| BIONYX             | Resolute Onyx  | 1,243         | No angio FU       |                                   |                            | 12              | 2.5%       |                                     |
|                    | Orsiro         | 1,245         |                   |                                   |                            |                 | 2.0%       |                                     |

|                   |            |       |             |    |      |    |      |    |
|-------------------|------------|-------|-------------|----|------|----|------|----|
| DESSOLVE III      | MiStent    | 703   | No angio FU |    |      | 12 | 2.6% |    |
|                   | XIENCE     | 695   |             |    |      |    | 3.7% |    |
| SORT OUT IX       | BioFreedom | 1,572 | No angio FU |    |      | 12 | 3.5% |    |
|                   | Orsiro     | 1,579 |             |    |      |    | 1.3% |    |
| TARGET All Comers | FIREHAWK   | 823   | 13          | 71 | 8.6% | 12 | 1.1% | NO |
|                   | XIENCE     | 830   |             | 66 | 8.0% |    | 2.3% |    |
| TALENT            | Supraflex  | 720   | No angio FU |    |      | 12 | 2.7% |    |
|                   | XIENCE     | 715   |             |    |      |    | 4.0% |    |

angio: angiography; FU: follow-up; N: number; TLR: target lesion revascularisation; Y: year

**Supplementary Table 9. List of antiplatelet therapy regimens and bleeding event rates in the included trials.**

| Study name         | Study start year | Device          | N of patients | Recommended DAPT duration (months) | Recommended P2Y <sub>12</sub> inhibitor                                  | Percent of patients on DAPT at 1 year | Percent of patients with major bleeding at 1 year | Definition for bleeding event |
|--------------------|------------------|-----------------|---------------|------------------------------------|--------------------------------------------------------------------------|---------------------------------------|---------------------------------------------------|-------------------------------|
| SIRTAX             | 2003             | CYPHER          | 503           | 12                                 | Clopidogrel                                                              | Not reported                          | Not reported                                      | NA                            |
|                    |                  | TAXUS Express   | 509           |                                    |                                                                          | Not reported                          | Not reported                                      | NA                            |
| LEADERS            | 2006             | BioMatrix       | 857           | 12                                 | Clopidogrel                                                              | Not reported                          | Not reported                                      | NA                            |
|                    |                  | CYPHER          | 850           |                                    |                                                                          | Not reported                          | Not reported                                      | NA                            |
| SORT OUT III       | 2006             | Endavor         | 1,162         | 12                                 | Clopidogrel                                                              | Not reported                          | Not reported                                      | NA                            |
|                    |                  | CYPHER          | 1,170         |                                    |                                                                          | Not reported                          | Not reported                                      | NA                            |
| COMPARE            | 2007             | XIENCE          | 897           | 12                                 | Clopidogrel                                                              | 70.0                                  | Not reported                                      | NA                            |
|                    |                  | TAXUS Liberté   | 903           |                                    |                                                                          | 70.0                                  | Not reported                                      | NA                            |
| PROTECT            | 2007             | Endavor         | 4,357         | 3 to 12                            | Ticlopidine or clopidogrel                                               | 87.0                                  | Not reported (only 2-year incidence reported)     | TIMI                          |
|                    |                  | CYPHER          | 4,352         |                                    |                                                                          | 88.0                                  | Not reported (only 2-year incidence reported)     | TIMI                          |
| SORT OUT IV        | 2007             | XIENCE / PROMUS | 1,390         | 12                                 | Clopidogrel or prasugrel                                                 | Not reported                          | Not reported                                      | NA                            |
|                    |                  | CYPHER          | 1,384         |                                    |                                                                          | Not reported                          | Not reported                                      | NA                            |
| Resolute All Comer | 2008             | Resolute        | 1,140         | At least 6                         | Clopidogrel                                                              | Not reported                          | Not reported                                      | NA                            |
|                    |                  | XIENCE          | 1,152         |                                    |                                                                          | Not reported                          | Not reported                                      | NA                            |
| COMPARE II         | 2009             | Nobori          | 1,795         | 12                                 | Clopidogrel                                                              | 67.0                                  | Not reported                                      | NA                            |
|                    |                  | XIENCE          | 912           |                                    |                                                                          | 66.6                                  | Not reported                                      | NA                            |
| SORT OUT V         | 2009             | Nobori          | 1,229         | 12                                 | Clopidogrel or prasugrel                                                 | Not reported                          | Not reported                                      | NA                            |
|                    |                  | CYPHER          | 1,239         |                                    |                                                                          | Not reported                          | Not reported                                      | NA                            |
| DUTCH PEERS        | 2010             | Resolute        | 906           | 12                                 | Clopidogrel                                                              | Not reported                          | Not reported                                      | NA                            |
|                    |                  | XIENCE          | 905           |                                    |                                                                          | Not reported                          | Not reported                                      | NA                            |
| HOST-ASSURE        | 2010             | PROMUS          | 2,503         | Not reported                       | Double dose of clopidogrel or normal dose of clopidogrel plus cilostazol | 91.1                                  | 1.1                                               | PLATO                         |
|                    |                  | Resolute        | 1,252         |                                    |                                                                          | 92.6                                  | 1.3                                               | PLATO                         |
| PLATINUM PLUS      | 2010             | PROMUS Element  | 1,952         | At least 6                         | Clopidogrel or prasugrel                                                 | 59.4                                  | Not reported                                      | NA                            |
|                    |                  | XIENCE          | 1,028         |                                    |                                                                          | 61.2                                  | Not reported                                      | NA                            |
| RESET              | 2010             | XIENCE          | 1,597         | At least 3                         | Ticlopidine or clopidogrel                                               | 89.0                                  | 1.0                                               | TIMI                          |
|                    |                  | CYPHER          | 1,600         |                                    |                                                                          | 90.0                                  | 1.3                                               | TIMI                          |
| NEXT               | 2011             | Nobori          | 1,617         | At least 3                         | Ticlopidine or clopidogrel                                               | 86.7                                  | 1.1                                               | TIMI                          |
|                    |                  | XIENCE / PROMUS | 1,618         |                                    |                                                                          | 87.5                                  | 0.9                                               | TIMI                          |
| SORT OUT VI        | 2011             | Resolute        | 1,502         | 12                                 | Clopidogrel, ticagrelor or prasugrel                                     | Not reported                          | Not reported                                      | NA                            |
|                    |                  | BioMatrix       | 1,497         |                                    |                                                                          | Not reported                          | Not reported                                      | NA                            |
| BIO-RESORT         | 2012             | SYNERGY         | 1,172         | 6 to 12                            | Clopidogrel, ticagrelor or prasugrel                                     | 85.5                                  | Not reported                                      | NA                            |
|                    |                  | Resolute        | 1,173         |                                    |                                                                          | 86.3                                  | Not reported                                      | NA                            |
|                    |                  | Orsiro          | 1,169         |                                    |                                                                          | 85.1                                  | Not reported                                      | NA                            |
| BIOSCIENCE         | 2012             | Orsiro          | 1,063         | 12                                 | Clopidogrel, ticagrelor or prasugrel                                     | 83.4                                  | 2.9                                               | BARC 3-5                      |
|                    |                  | XIENCE          | 1,056         |                                    |                                                                          | 82.1                                  | 2.6                                               | BARC3-5                       |
| SORT OUT VII       | 2012             | Orsiro          | 1,261         | 12                                 | Clopidogrel, ticagrelor or prasugrel                                     | Not reported                          | Not reported                                      | NA                            |

|                              |      |                  |       |                                                           |                                         |              |                     |                            |
|------------------------------|------|------------------|-------|-----------------------------------------------------------|-----------------------------------------|--------------|---------------------|----------------------------|
|                              |      | Nobori           | 1,264 |                                                           |                                         | Not reported | <b>Not reported</b> | NA                         |
| <b>ReCre8</b>                | 2014 | Resolute         | 751   | 1 for Tn negative /<br>12 Tn positive                     | Clopidogrel, ticagrelor or<br>prasugrel | 40.1         | <b>1.7</b>          | BARC 3-5                   |
|                              |      | Cre8             | 751   |                                                           |                                         | 39.4         | <b>1.6</b>          | BARC 3-5                   |
| <b>SORT OUT<br/>VIII</b>     | 2014 | SYNER<br>Y       | 1,385 | 12                                                        | Clopidogrel, ticagrelor or<br>prasugrel | Not reported | <b>Not reported</b> | NA                         |
|                              |      | BioMatri<br>x    | 1,379 |                                                           |                                         | Not reported | <b>Not reported</b> | NA                         |
| <b>BIONYX</b>                | 2015 | Resolute<br>Onyx | 1,243 | At least 6 for stable<br>coronary disease /<br>12 for ACS | Clopidogrel, ticagrelor or<br>prasugrel | 83.9         | <b>2.5</b>          | BARC 3 or 5 or<br>any TIMI |
|                              |      | Orsiro           | 1,245 |                                                           |                                         | 82.2         | <b>2.7</b>          | BARC 3 or 5 or<br>any TIMI |
| <b>DESSOLVE<br/>III</b>      | 2015 | MiStent          | 703   | At least 6                                                | Clopidogrel, ticagrelor or<br>prasugrel | Not reported | <b>Not reported</b> | NA                         |
|                              |      | XIENCE           | 695   |                                                           |                                         | Not reported | <b>Not reported</b> | NA                         |
| <b>SORT OUT<br/>IX</b>       | 2015 | BioFree<br>dm    | 1,572 | 6 for stable<br>coronary disease /<br>12 for ACS          | Clopidogrel, ticagrelor or<br>prasugrel | Not reported | <b>Not reported</b> | NA                         |
|                              |      | Orsiro           | 1,579 |                                                           |                                         | Not reported | <b>Not reported</b> | NA                         |
| <b>TARGET All<br/>Comers</b> | 2015 | FIREHA<br>WK     | 823   | At least 6 for stable<br>coronary disease /<br>12 for ACS | Clopidogrel, ticagrelor or<br>prasugrel | Not reported | <b>Not reported</b> | NA                         |
|                              |      | XIENCE           | 830   |                                                           |                                         | Not reported | <b>Not reported</b> | NA                         |
| <b>TALENT</b>                | 2016 | Suprafle<br>x    | 720   | At least 6 for stable<br>coronary disease /<br>12 for ACS | Clopidogrel, ticagrelor or<br>prasugrel | Not reported | <b>Not reported</b> | NA                         |
|                              |      | XIENCE           | 715   |                                                           |                                         | Not reported | <b>Not reported</b> | NA                         |

ACS: acute coronary syndrome; DAPT: dual antiplatelet therapy; N: number; NA: not applicable; TIMI: Thrombolysis In Myocardial Infarction; Tn: troponin

BioFreedom™ (Biosensors, Singapore)  
BioMatrix™ (Biosensors, Singapore)  
Cre8™ (Alvimedica, Istanbul, Turkey)  
CYPHER® (Cordis Santa Clara, CA, USA)  
Endeavor® (Medtronic, Minneapolis, MN, USA)  
FIREHAWK® (MicroPort, Shanghai, China)  
MiStent® (Micell Technologies, Durham, NC, USA)  
Nobori® (Terumo Corp., Tokyo, Japan)  
Orsiro (Biotronik, Berlin Germany)  
PROMUST™ (Boston Scientific, Marlborough, MA, USA)  
Resolute™ (Medtronic, Minneapolis, MN, USA)  
Resolute Onyx™ (Medtronic, Minneapolis, MN, USA)  
Supraflex™ (Sahajanand Medical Technologies, Mumbai, India)  
SYNERGY™ (Boston Scientific, Marlborough, MA, USA)  
TAXUS Express (Boston Scientific, Marlborough, MA, USA)  
TAXUS™ Liberté™ (Boston Scientific, Marlborough, MA, USA)  
XIENCE® (Abbott Laboratories, Abbott Park, IL, USA)

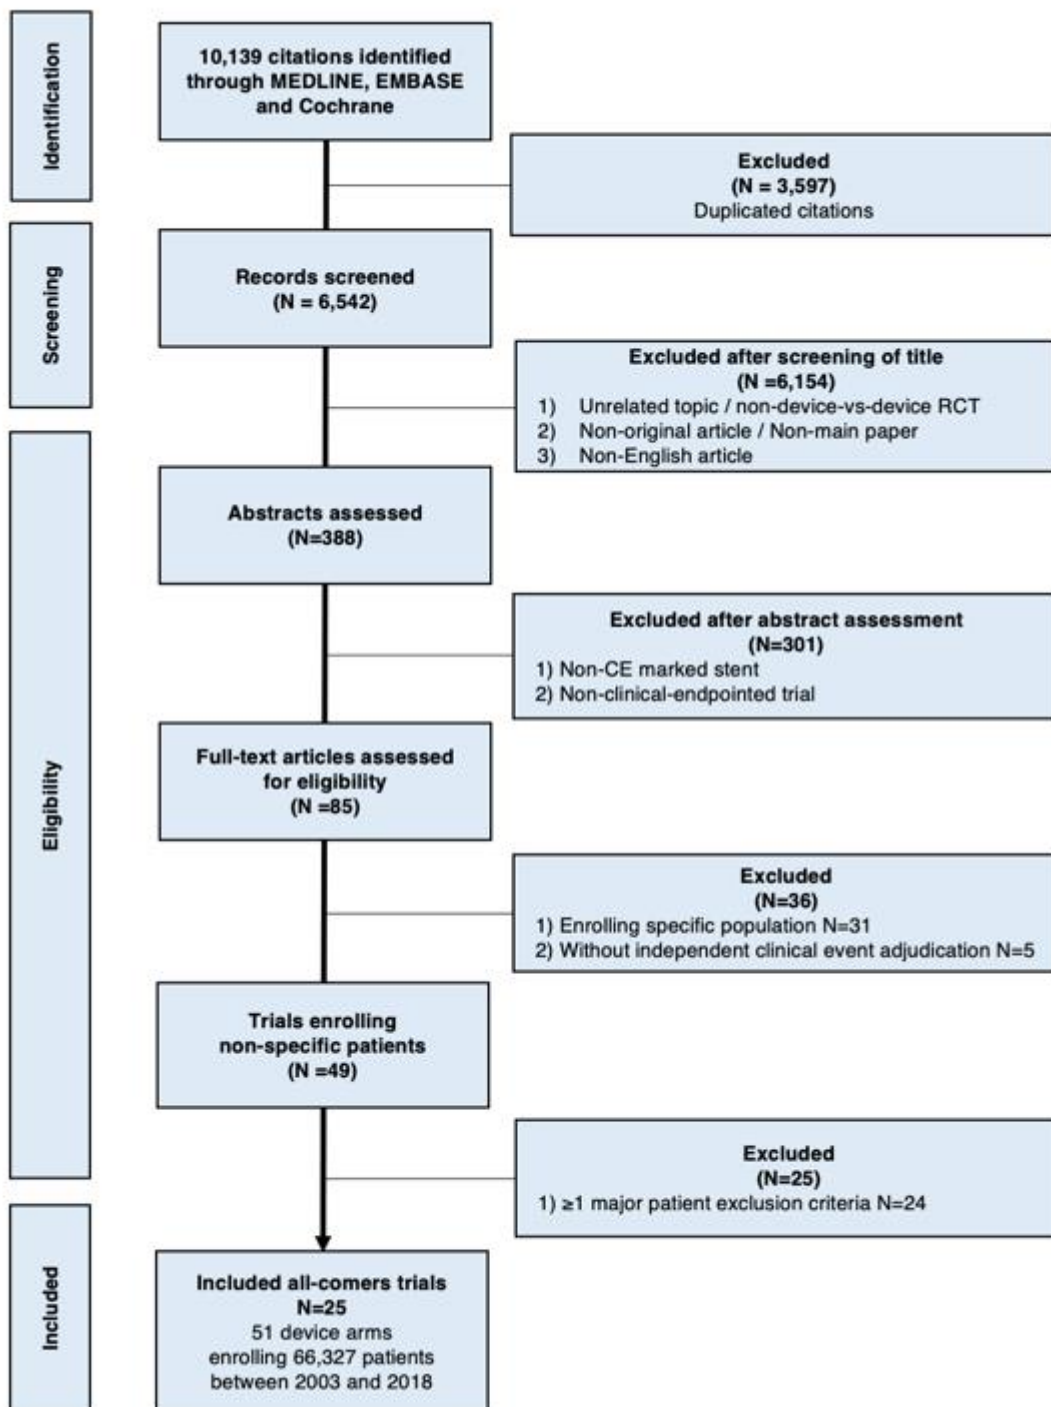

**Supplementary Figure 1.** Study selection process.

N: number; RCT: randomised controlled trial



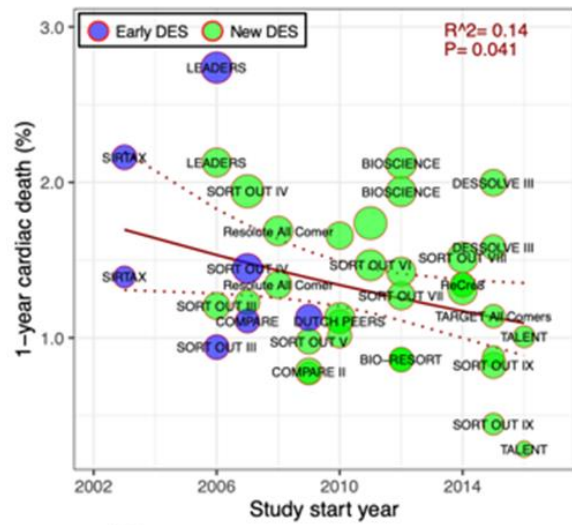

| Study start year | N of study arms | N of patients | Incidence (%) [95%CI]    |
|------------------|-----------------|---------------|--------------------------|
| 2003-2007        | 10              | 9600          | 1.63 [1.27, 1.99]        |
| 2008-2012        | 19              | 23135         | 1.27 [1.09, 1.45]        |
| 2013-2016        | 12              | 11787         | 1.14 [0.86, 1.41]        |
| <b>Total</b>     |                 |               | <b>1.32 [1.17, 1.47]</b> |

$\chi^2 = 874.58, df = 63, p < 0.001, I^2 = 99.8\%$

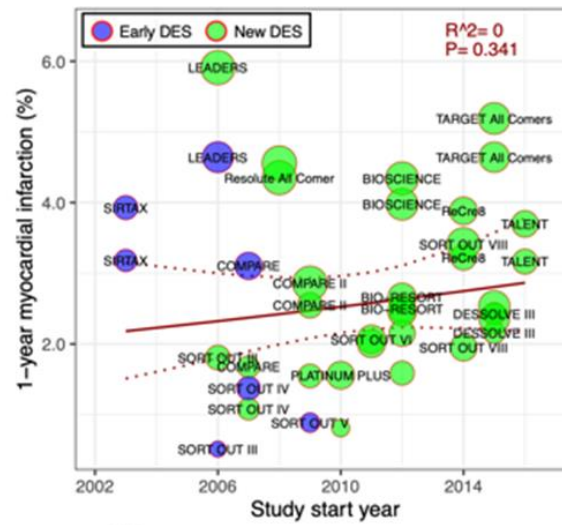

| Study start year | N of study arms | N of patients | Incidence (%) [95%CI]    |
|------------------|-----------------|---------------|--------------------------|
| 2003-2007        | 6               | 4495          | 3.74 [2.58, 4.90]        |
| 2008-2012        | 11              | 13339         | 2.94 [2.21, 3.66]        |
| 2013-2016        | 8               | 5872          | 3.55 [2.83, 4.26]        |
| <b>Total</b>     |                 |               | <b>3.32 [2.84, 3.81]</b> |

$\chi^2 = 1386.42, df = 34, p < 0.001, I^2 = 99.9\%$

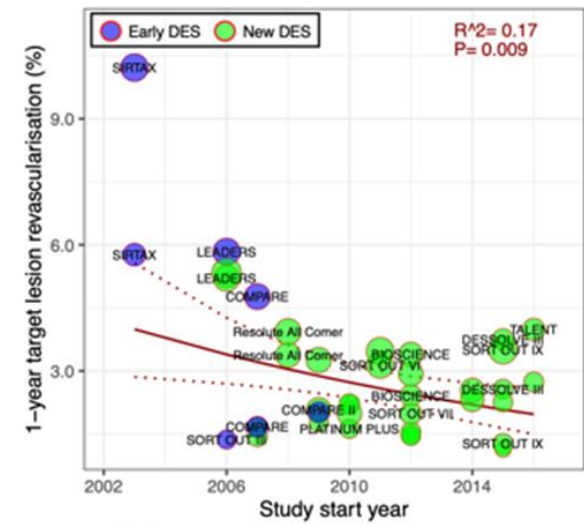

| Study start year | N of study arms | N of patients | Incidence (%) [95%CI]    |
|------------------|-----------------|---------------|--------------------------|
| 2003-2007        | 10              | 9600          | 4.32 [2.57, 6.08]        |
| 2008-2012        | 19              | 23135         | 2.43 [2.08, 2.79]        |
| 2013-2016        | 10              | 10296         | 2.60 [2.01, 3.19]        |
| <b>Total</b>     |                 |               | <b>2.96 [2.41, 3.51]</b> |

$\chi^2 = 2187.10, df = 38, p < 0.001, I^2 = 99.9\%$



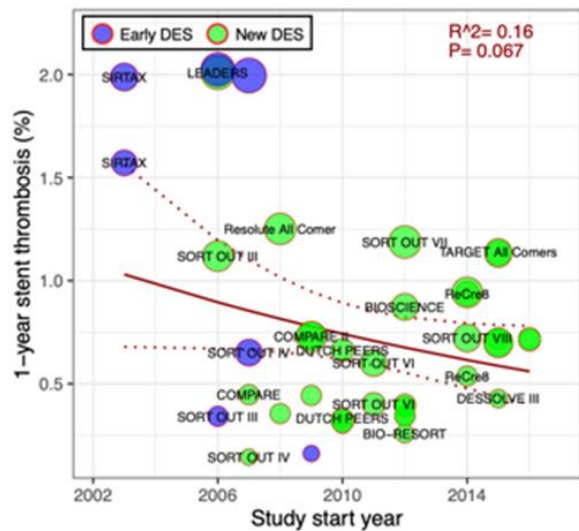

| Study start year | N of study arms | N of patients | Incidence (%) [95%CI]    |
|------------------|-----------------|---------------|--------------------------|
| 2003-2007        | 10              | 9600          | 1.23 [0.75, 1.71]        |
| 2008-2012        | 19              | 23135         | 0.53 [0.39, 0.67]        |
| 2013-2016        | 12              | 11787         | 0.78 [0.66, 0.90]        |
| <b>Total</b>     |                 |               | <b>0.77 [0.61, 0.93]</b> |

$Q = 10206.90$ ,  $df = 43$ ,  $p = 0.00$ ,  $I^2 = 99.9\%$

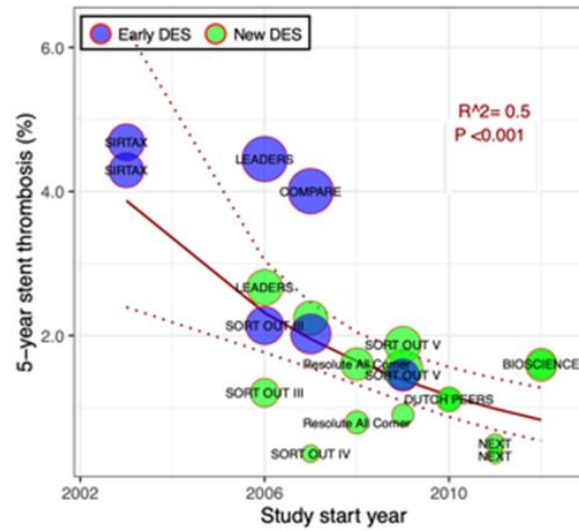

| Study start year | N of study arms | N of patients | Incidence (%) [95%CI]    |
|------------------|-----------------|---------------|--------------------------|
| 2003-2007        | 10              | 9511          | 2.80 [1.89, 3.72]        |
| 2008-2012        | 10              | 11185         | 1.36 [1.14, 1.58]        |
| <b>Total</b>     |                 |               | <b>2.08 [1.52, 2.64]</b> |

$Q = 11814.05$ ,  $df = 19$ ,  $p = 0.00$ ,  $I^2 = 99.9\%$

Supplementary Figure 2. The results of sensitivity analysis.
